# Supplementary material for: An Effective Communication Topology for Performance Optimization: A Case Study of the Finite Volume WAve Modeling (FVWAM)
Source: Copernicus journal article supplement (doi:10.5194/egusphere-2024-2515), 2024-10-07
Supplement: Supplementary file [file Figure 12_Data receiving volume per process.pdf › Figure 12_Data receiving volume per process.pdf]

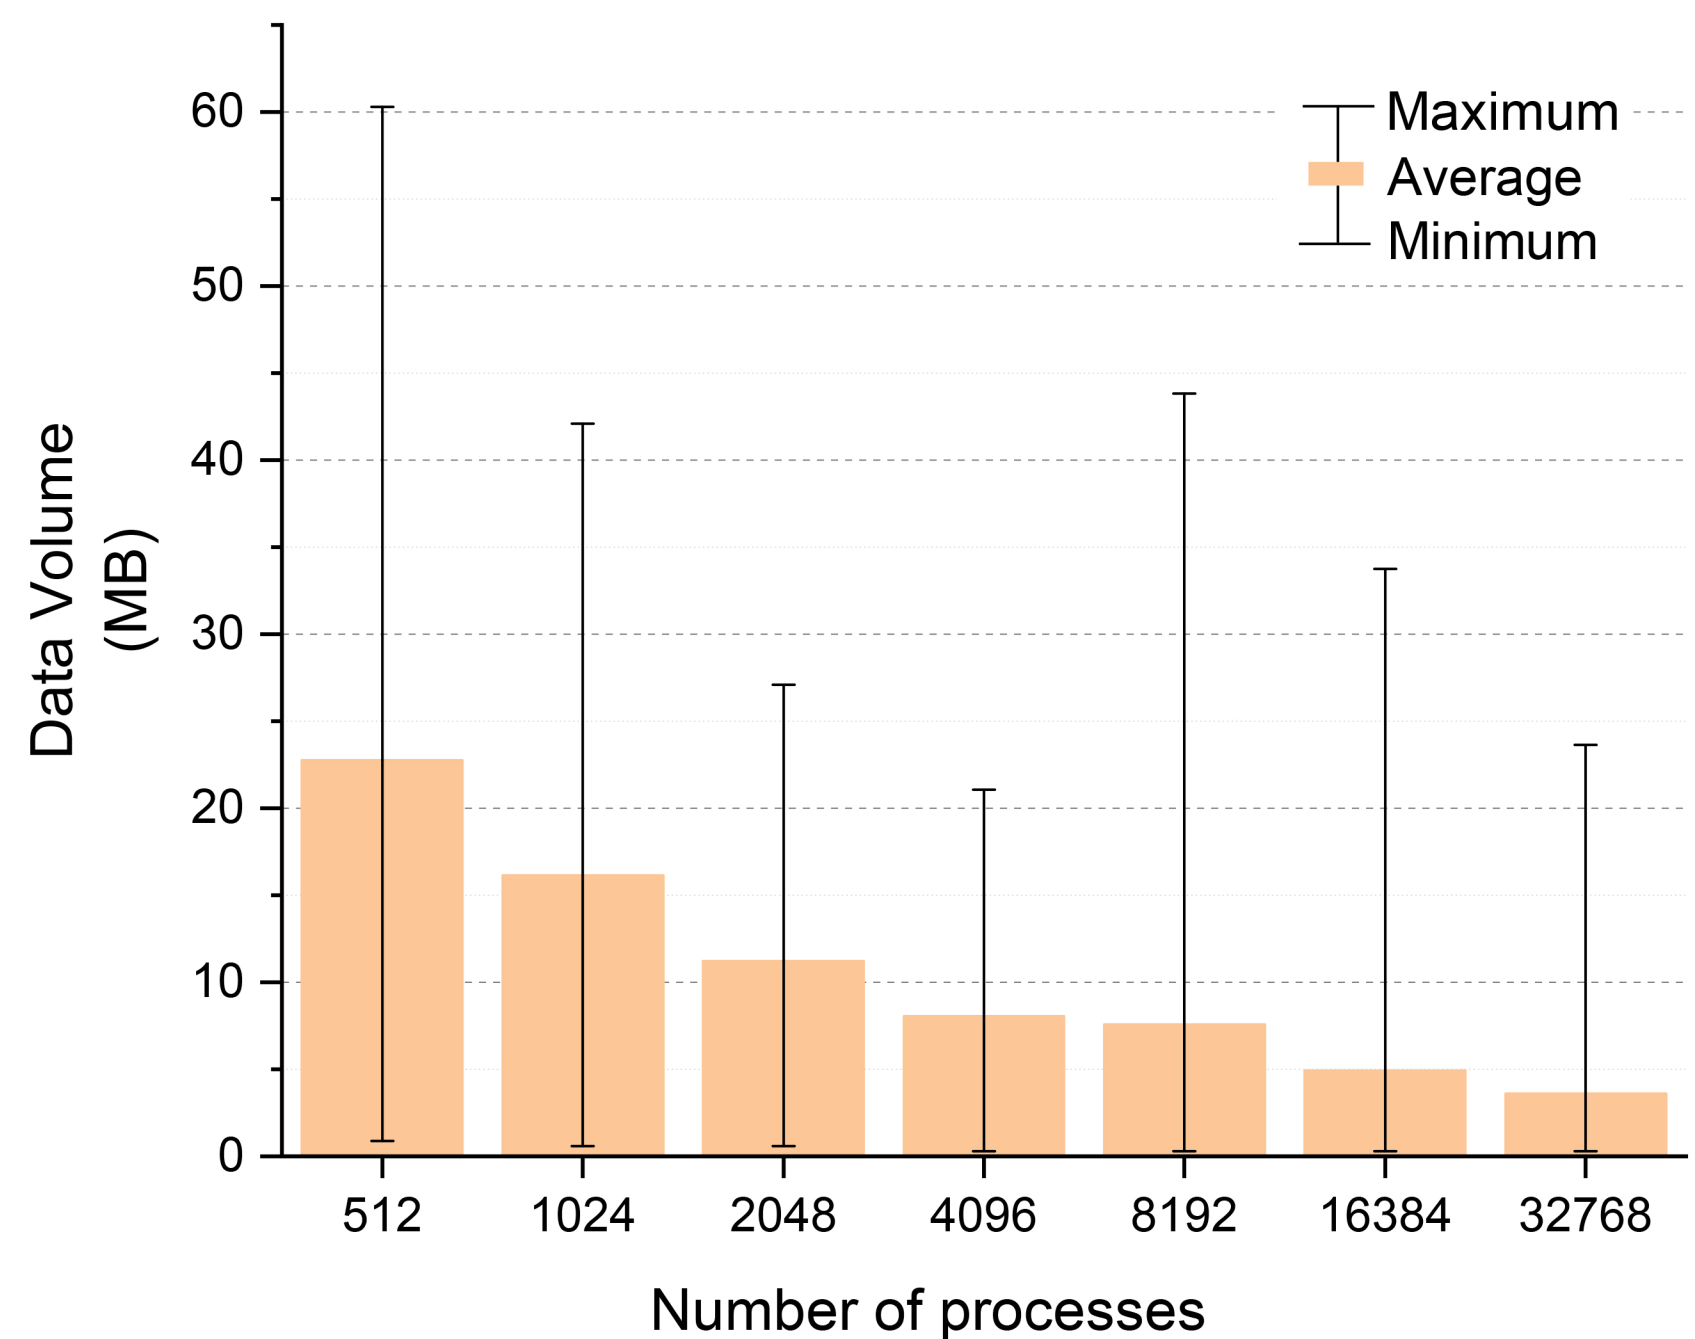

(a) Data receiving volume on each process

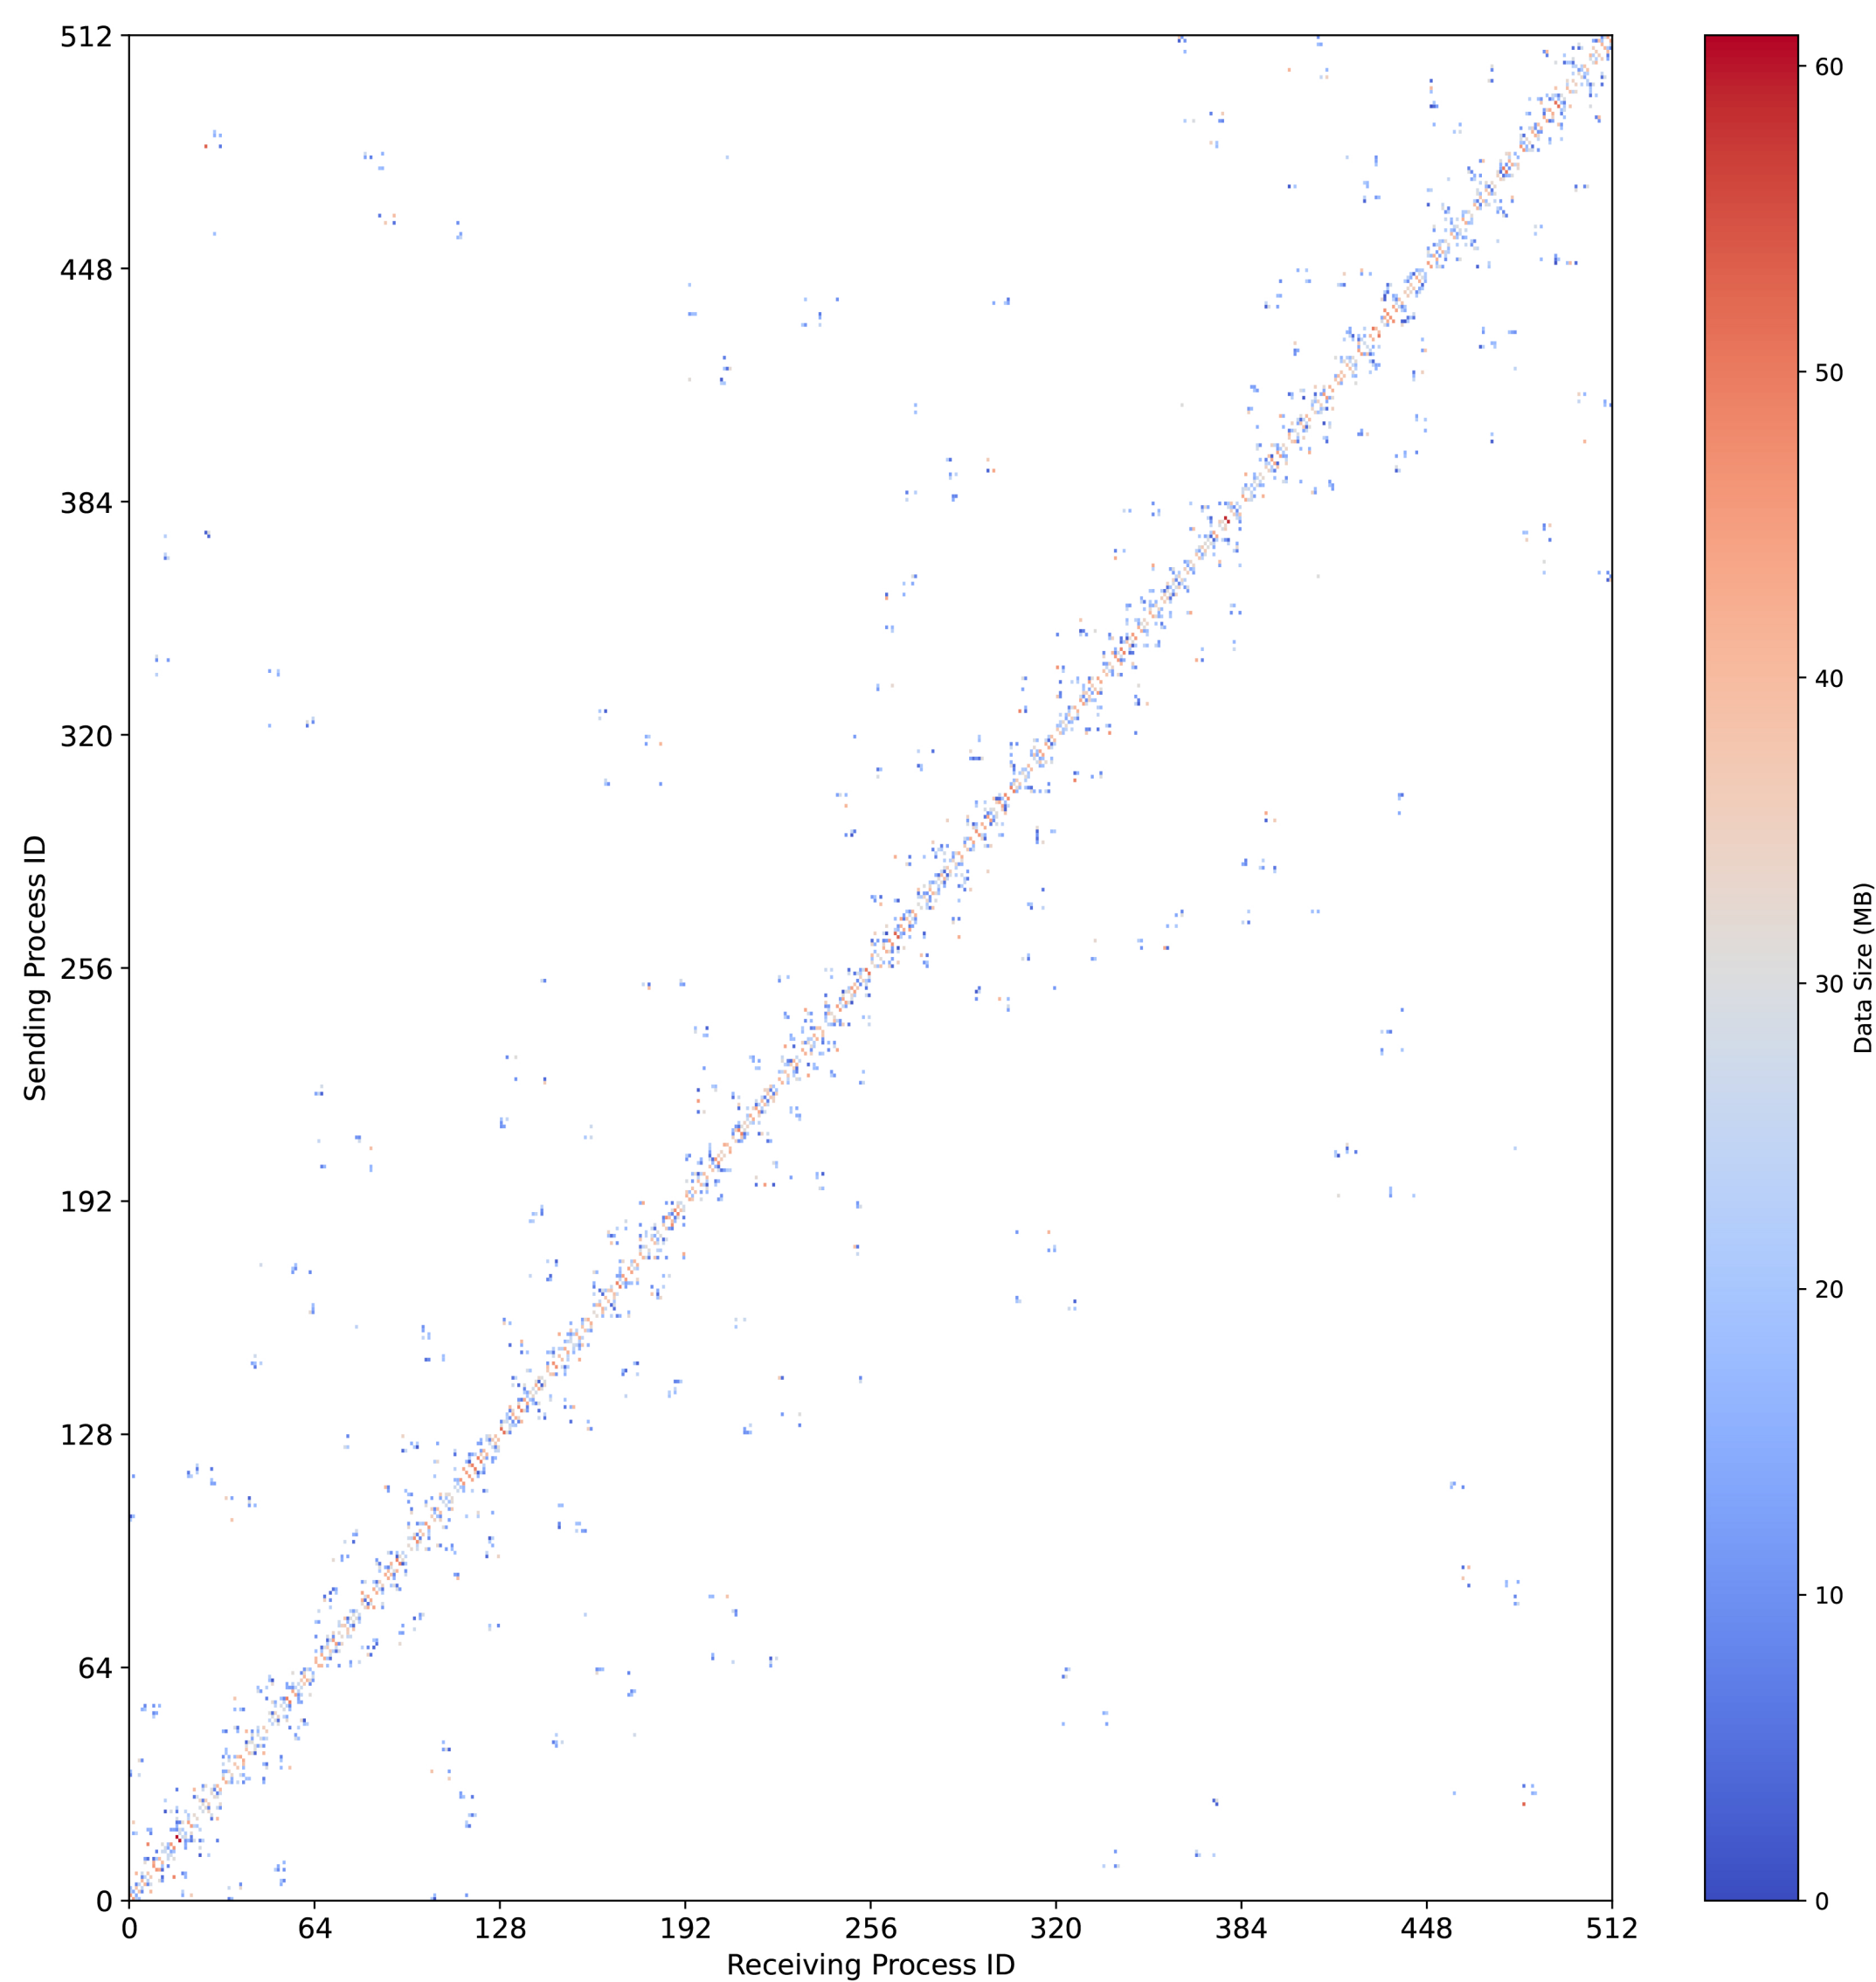

(b) Data receiving volume per process in 512 processes

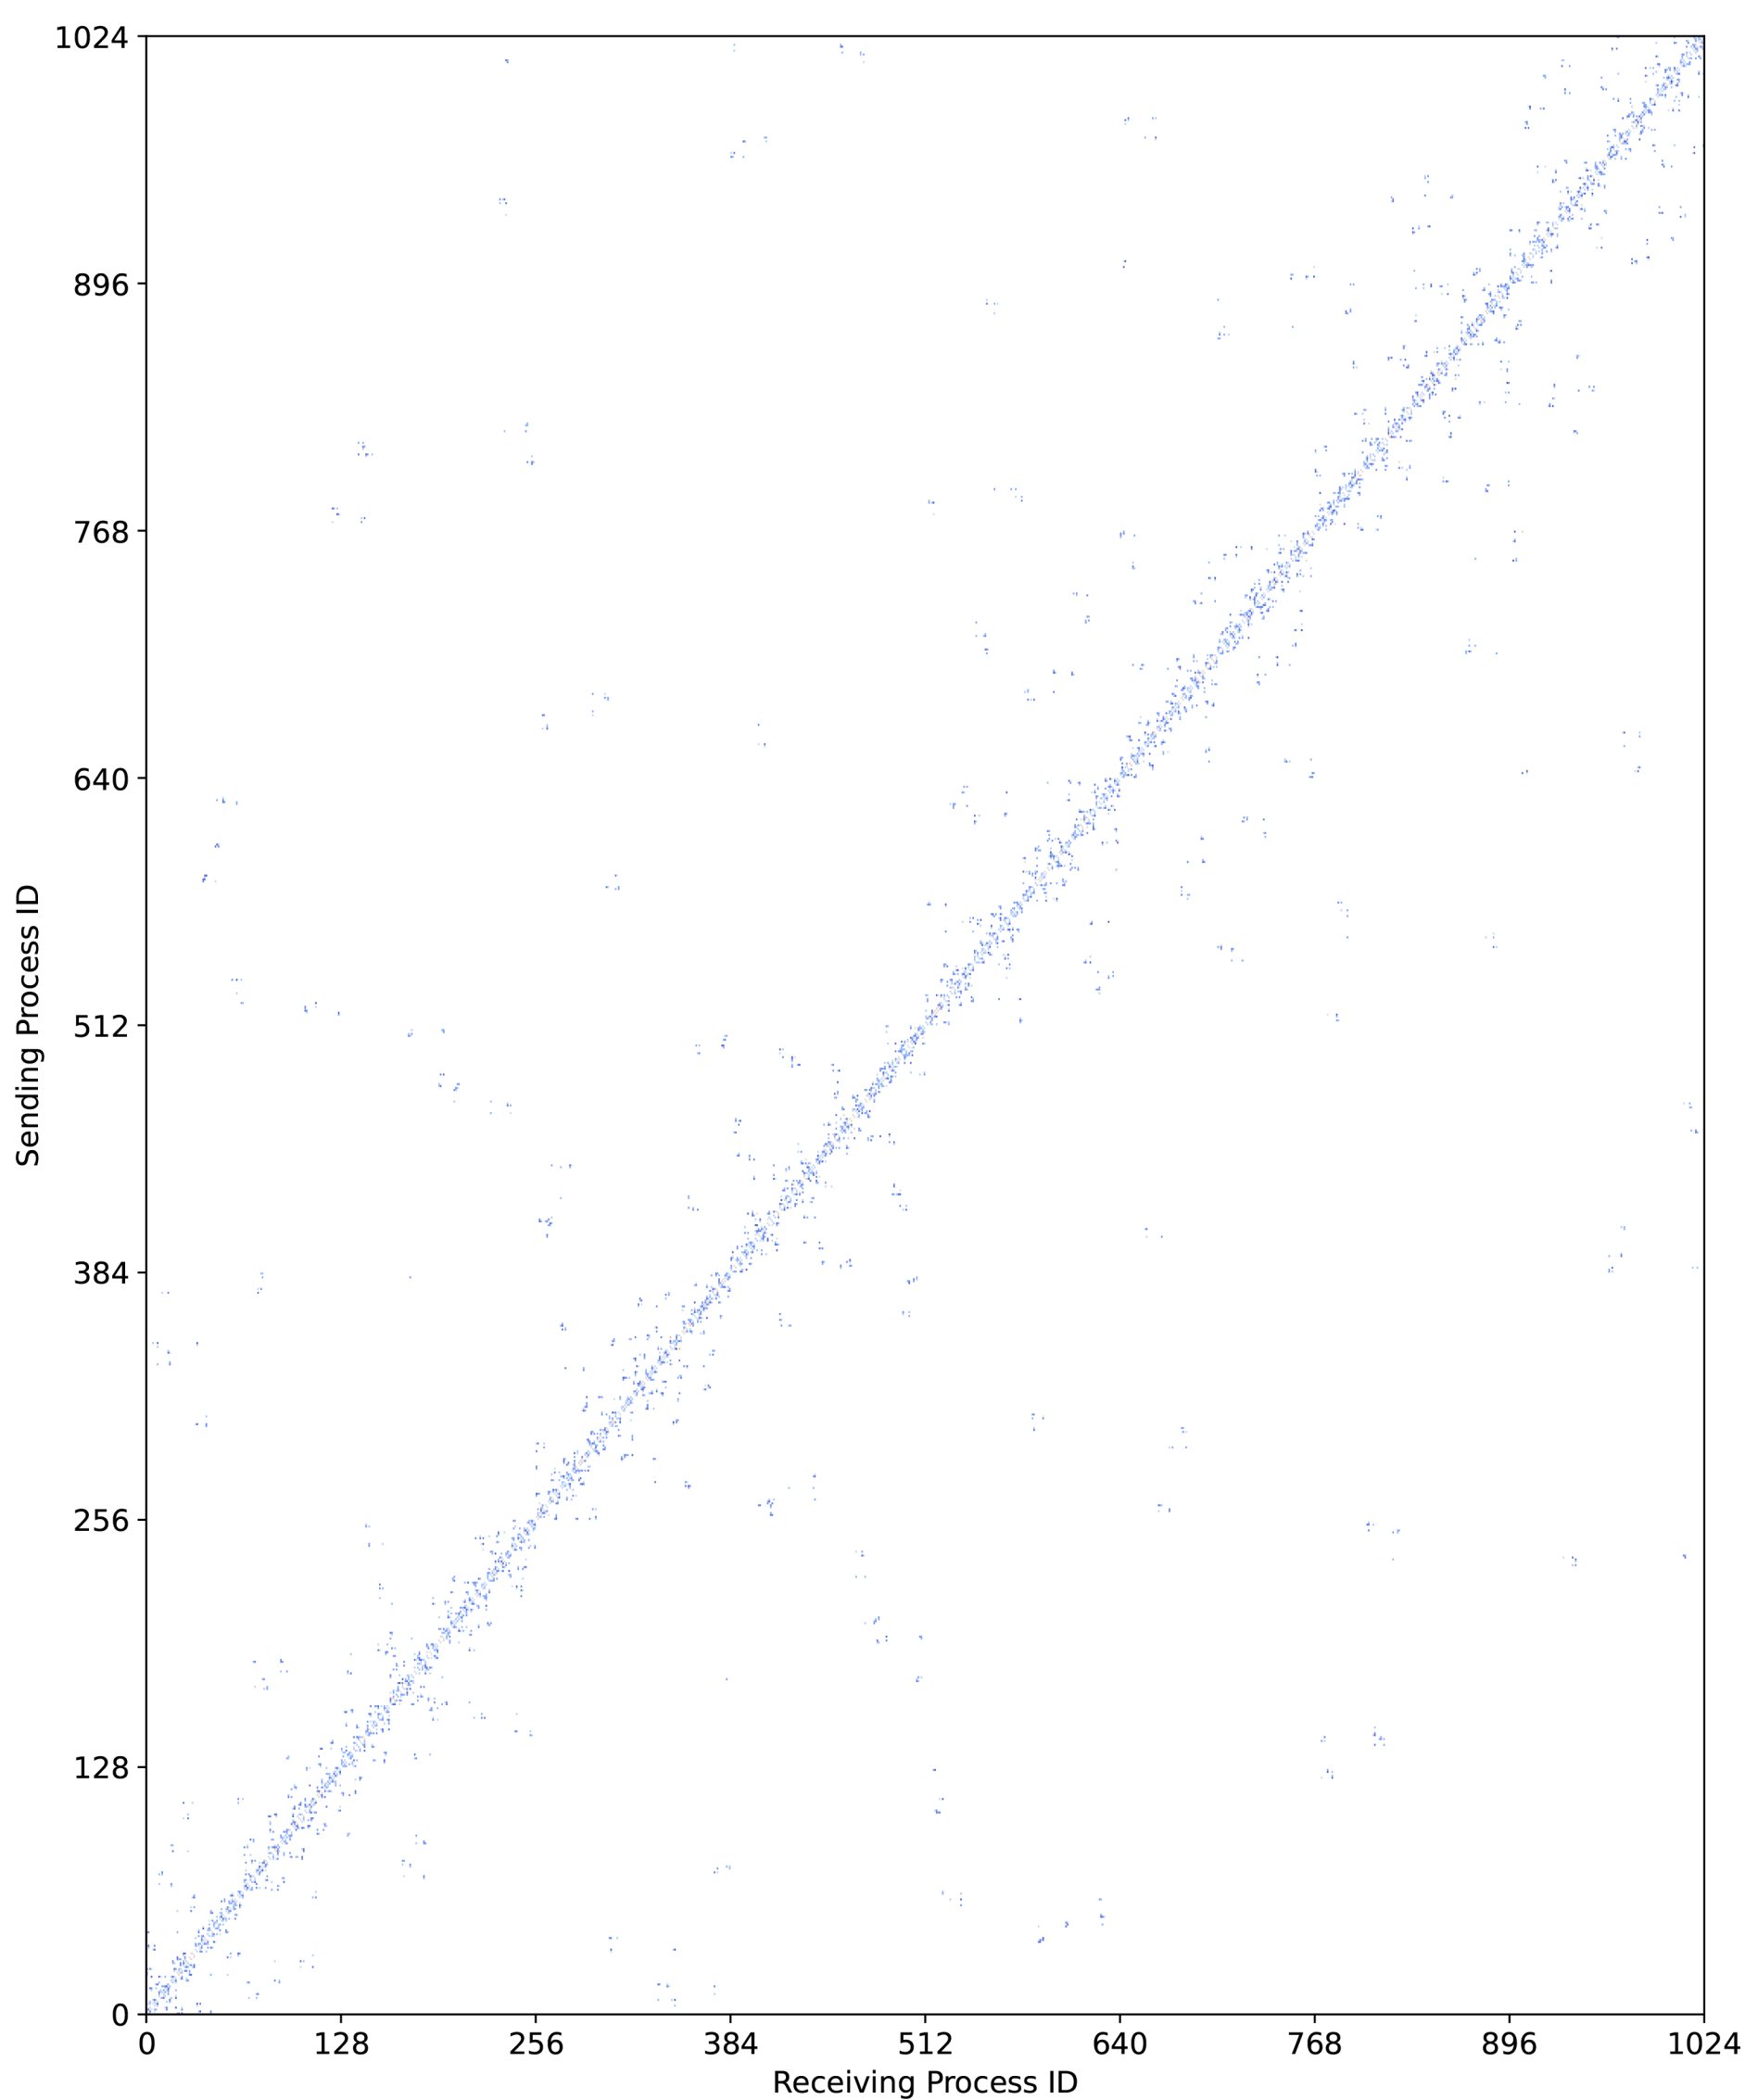

(c) Data receiving volume per process in 1024 processes

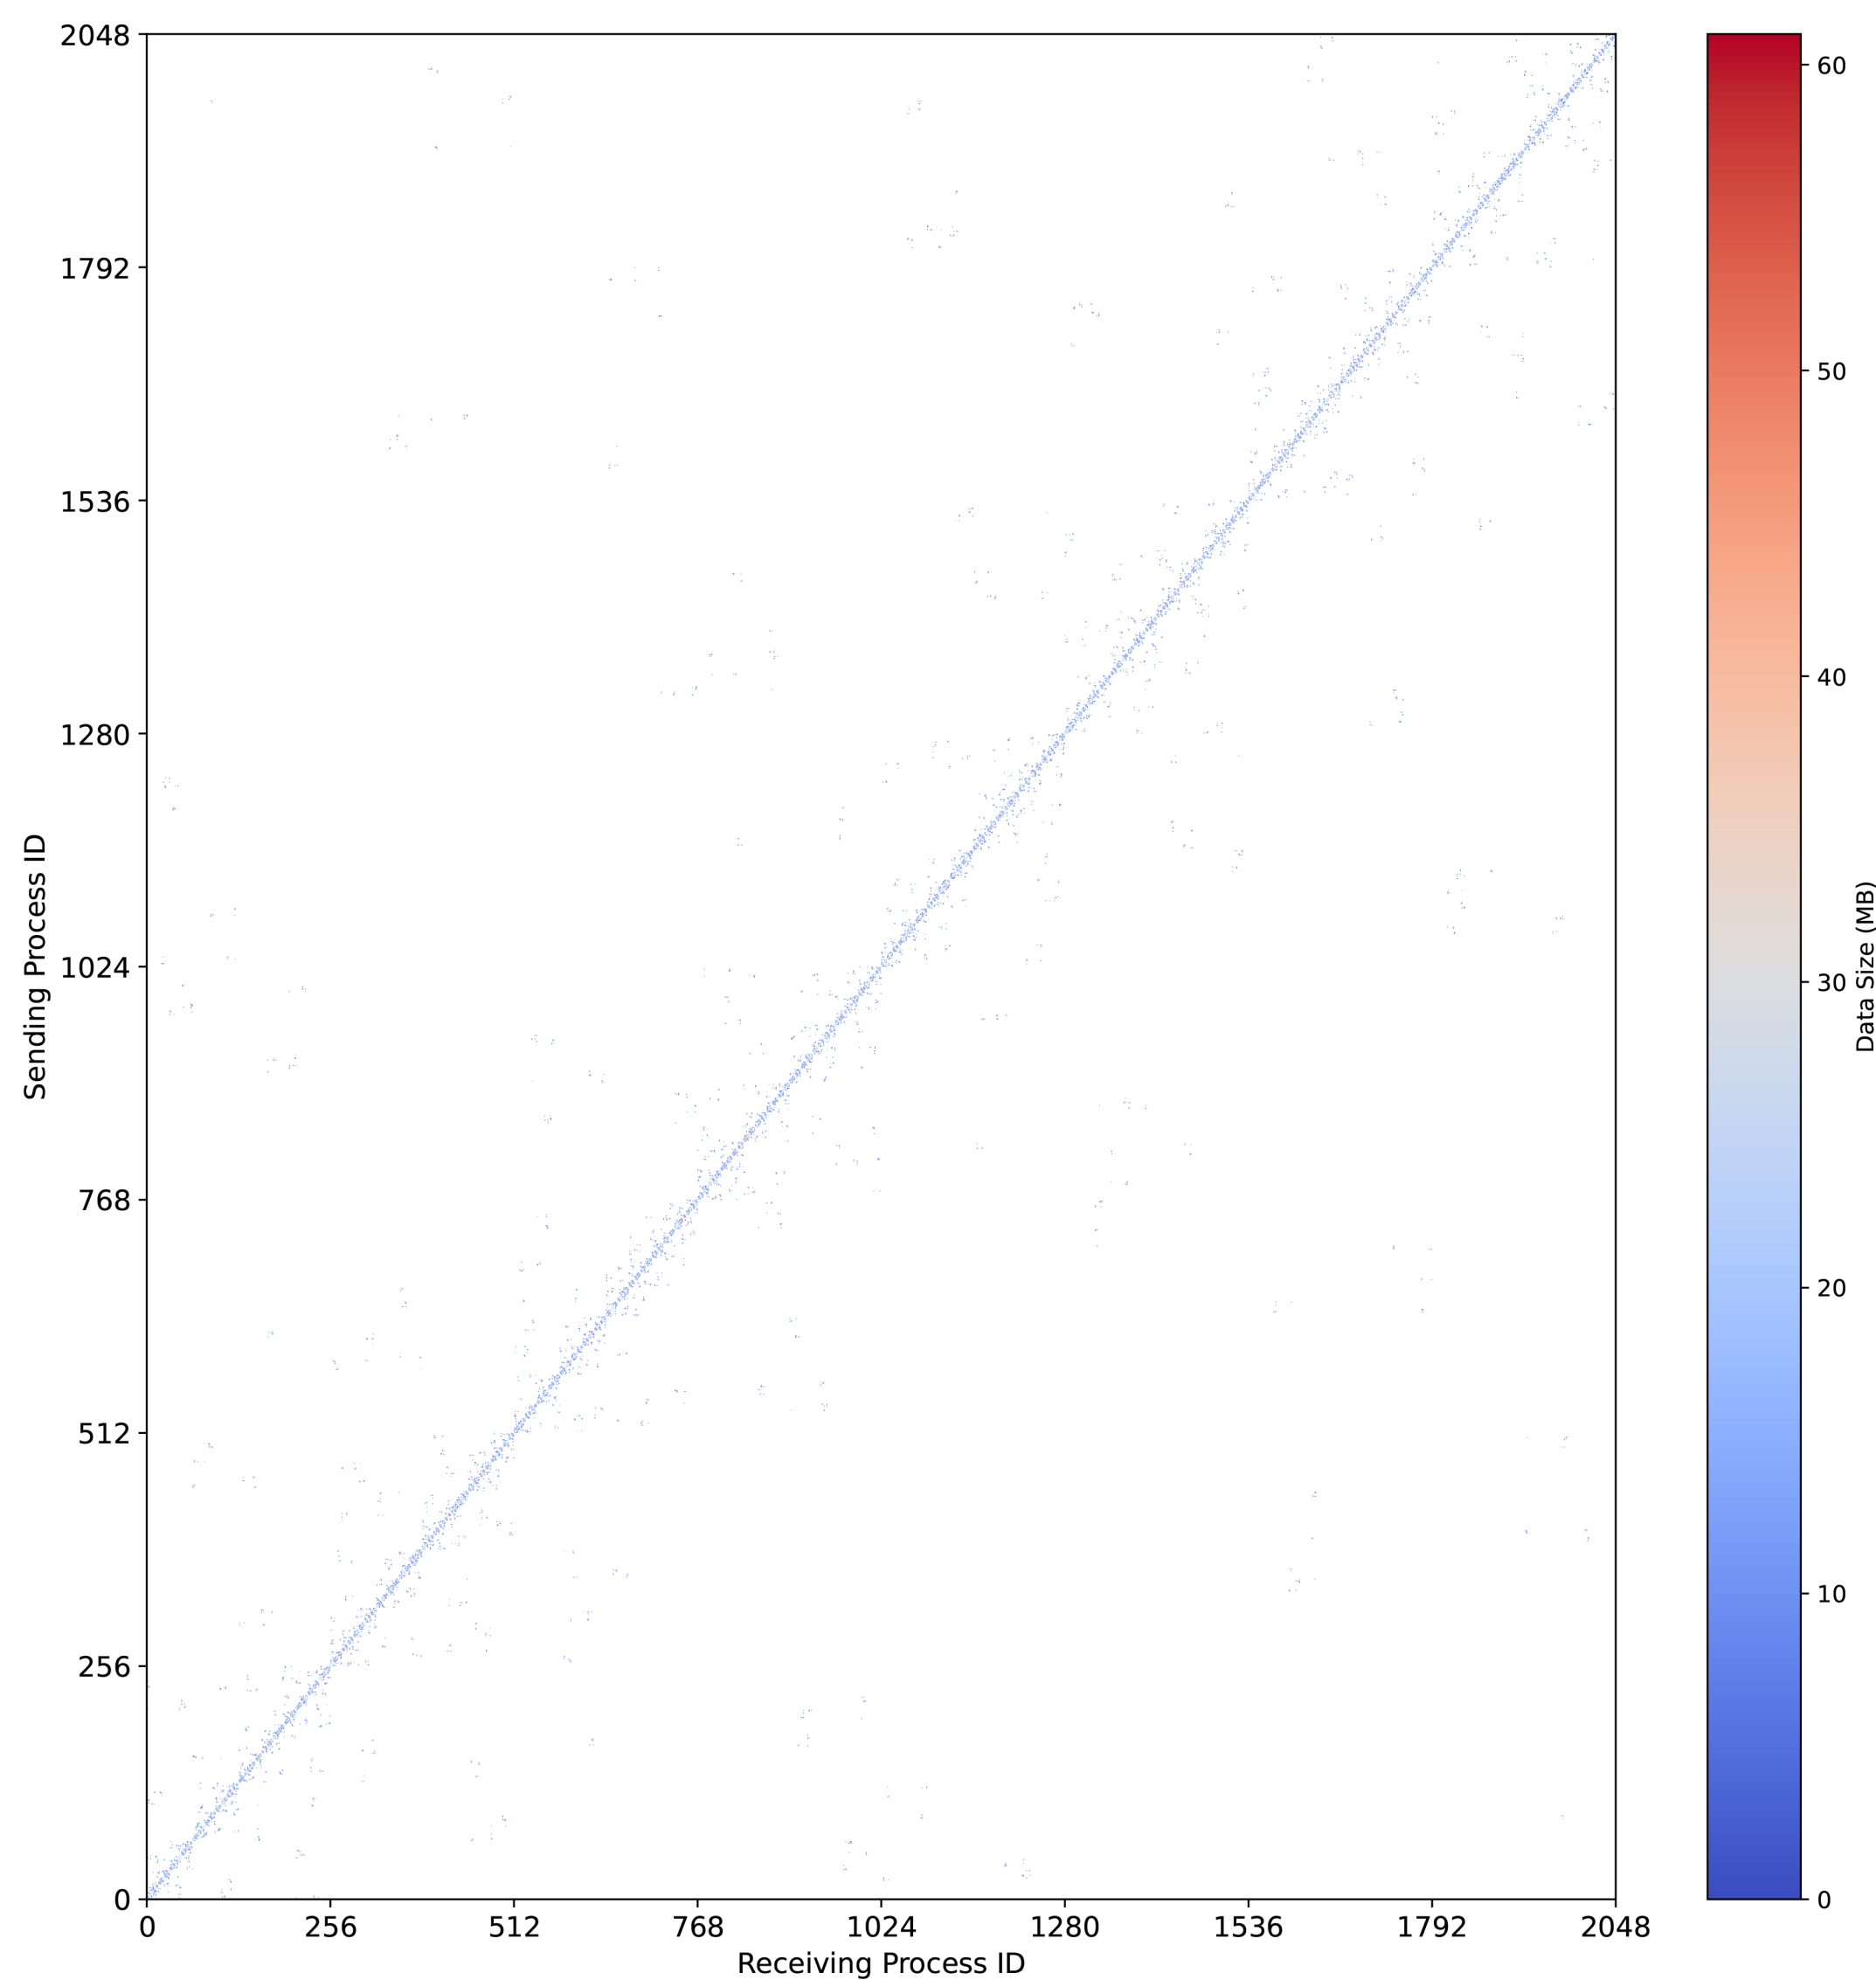

(d) Data receiving volume per process in 2048 processes

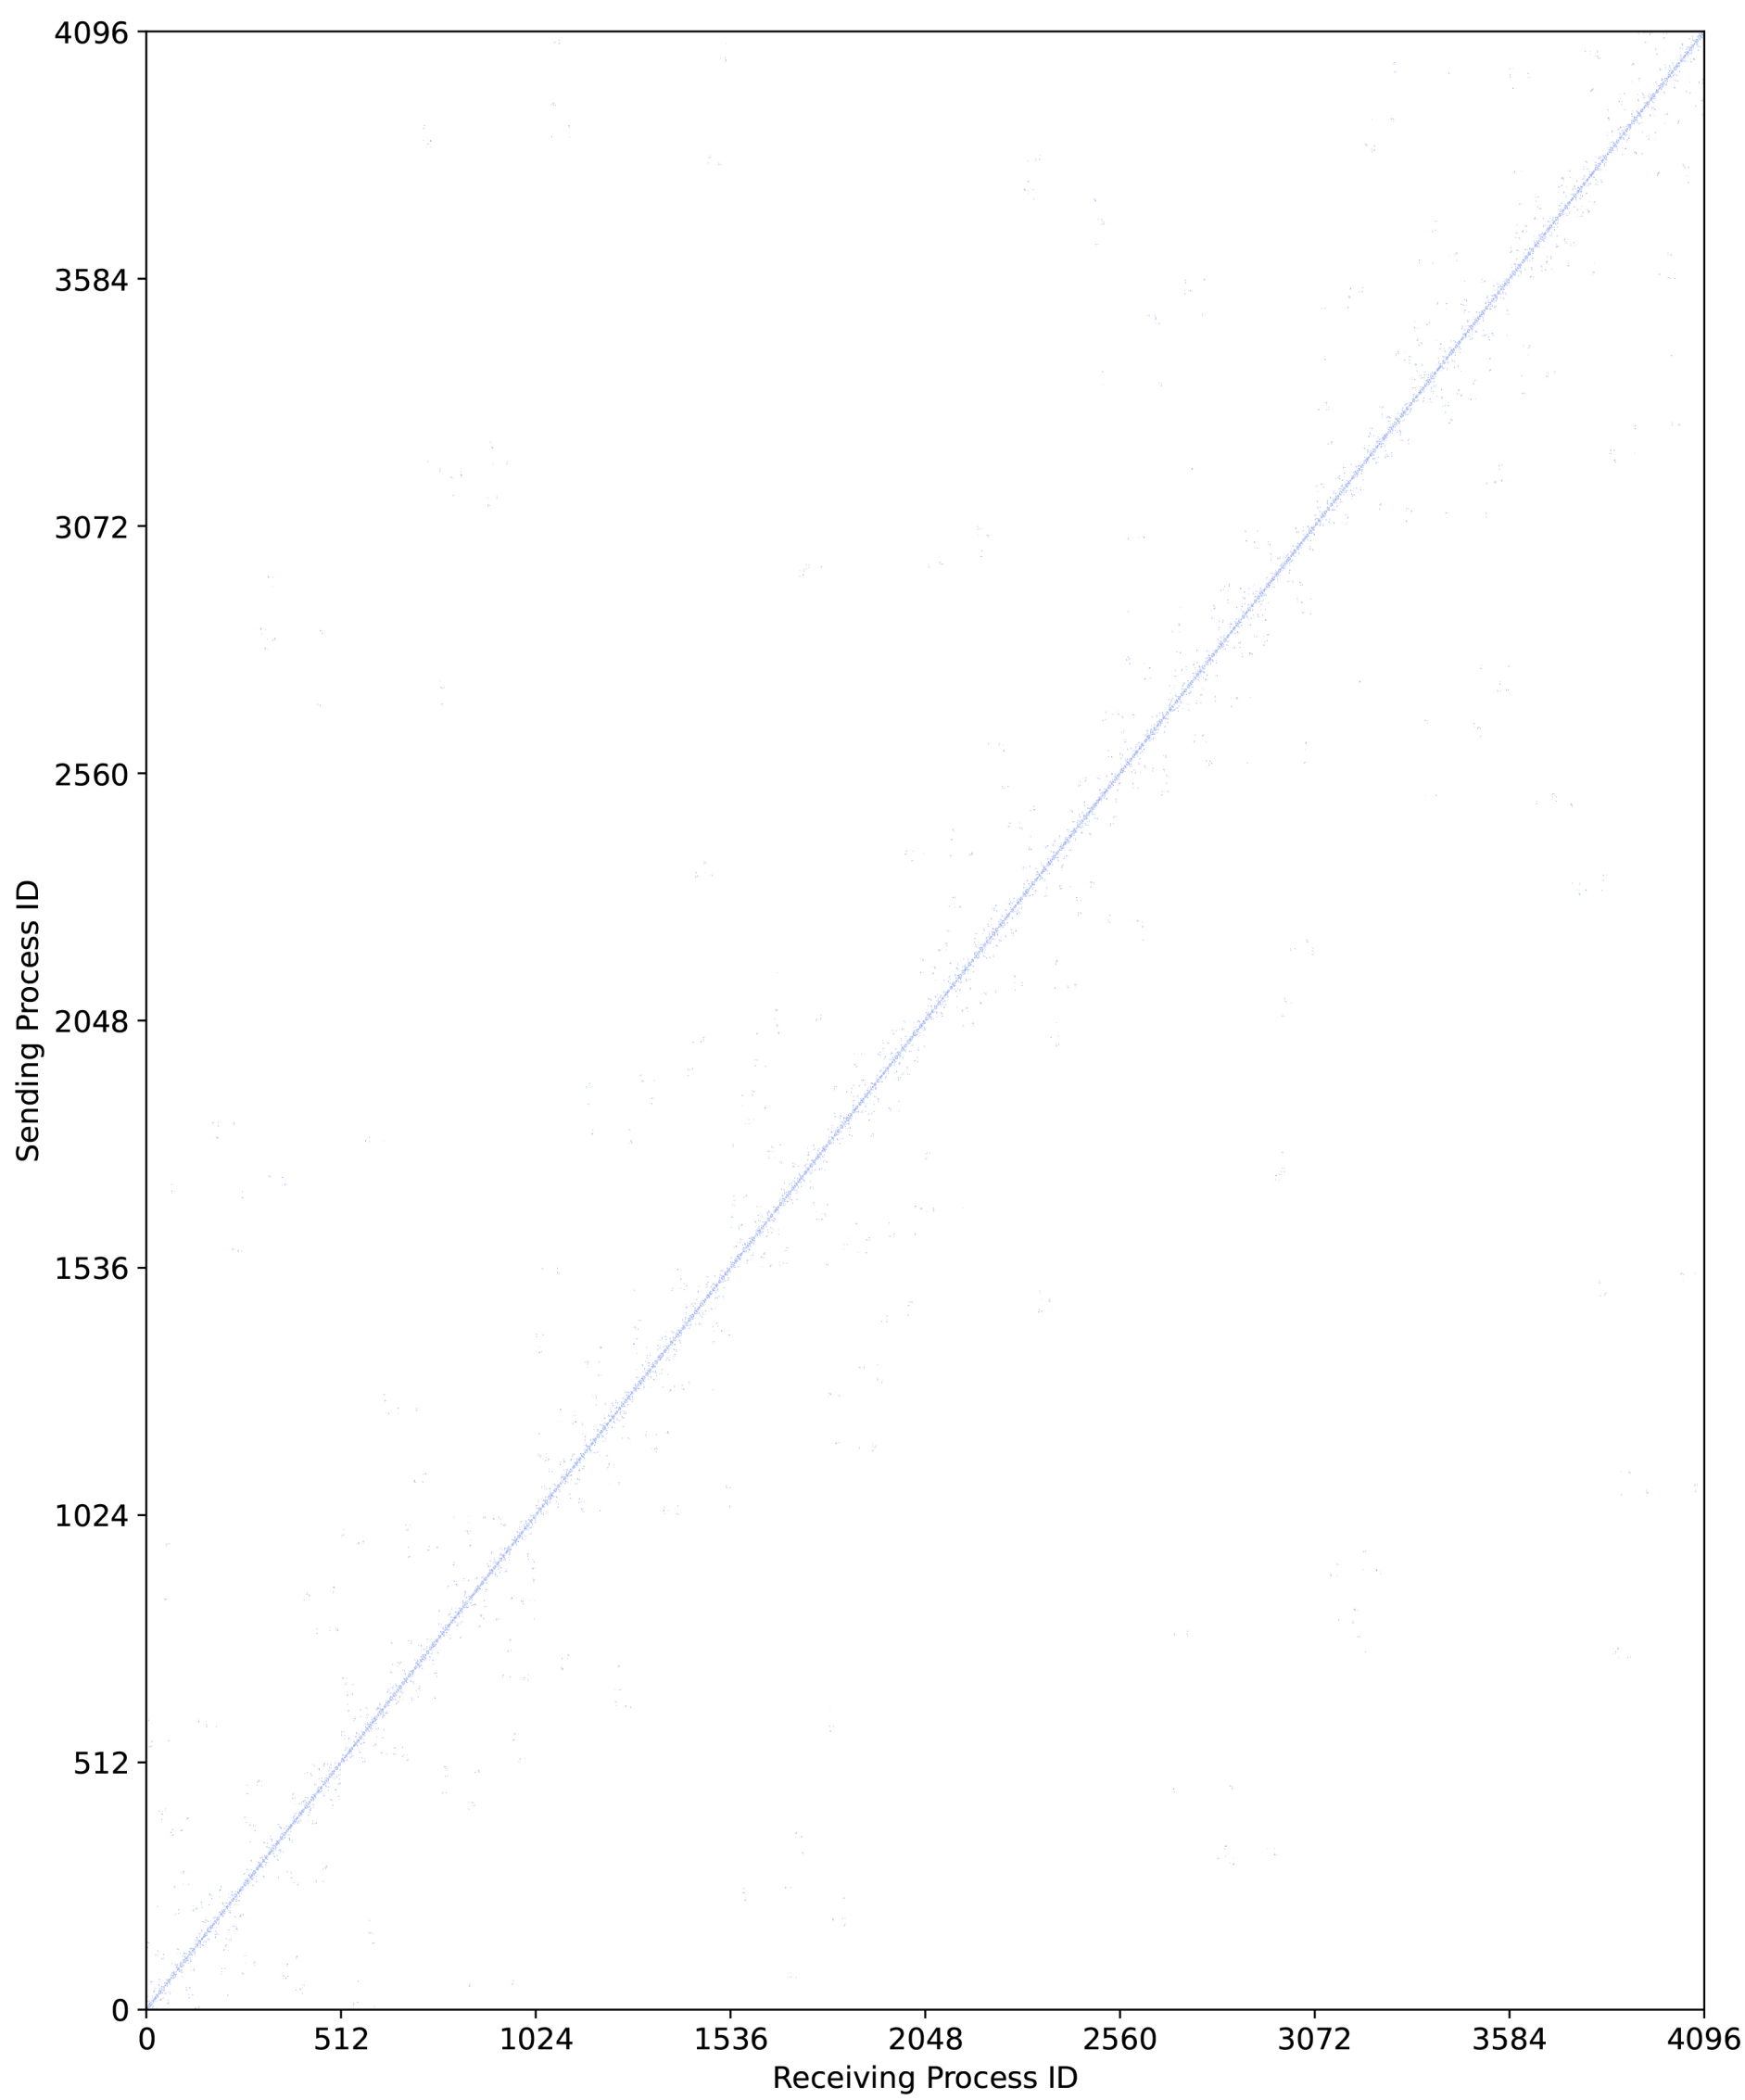

(e) Data receiving volume per process in 4096 processes

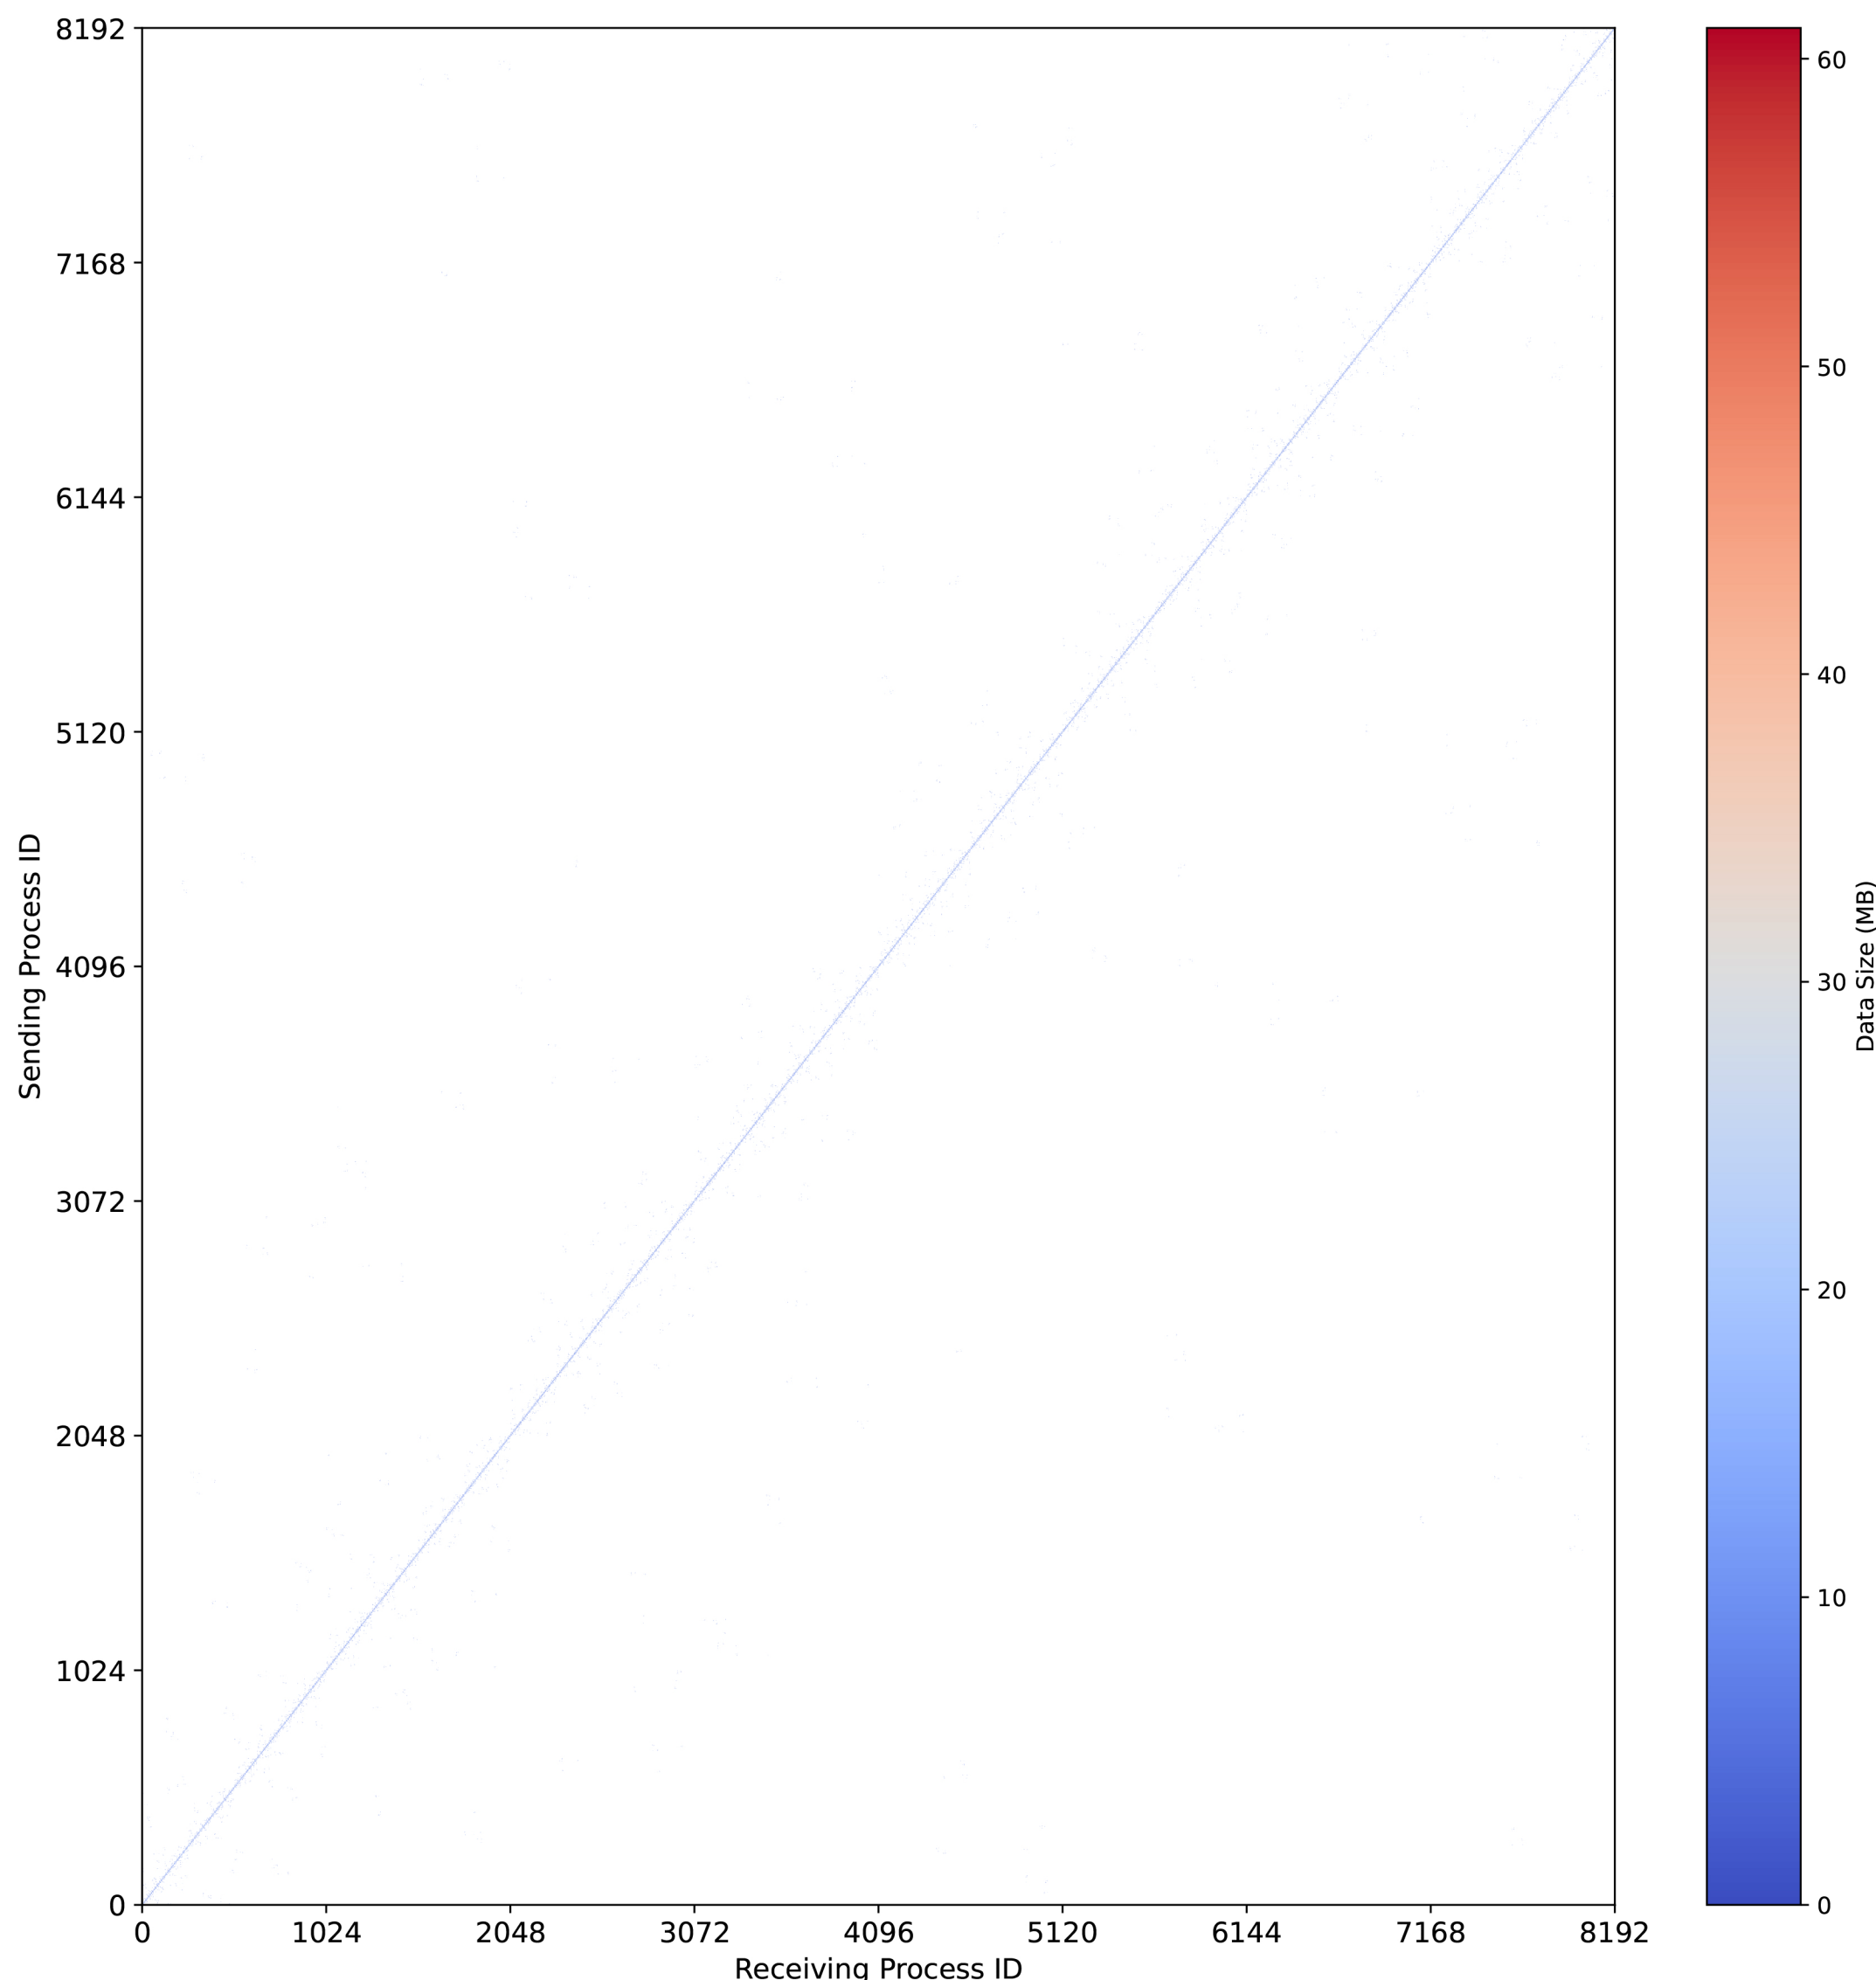

(f) Data receiving volume per process in 8192 processes

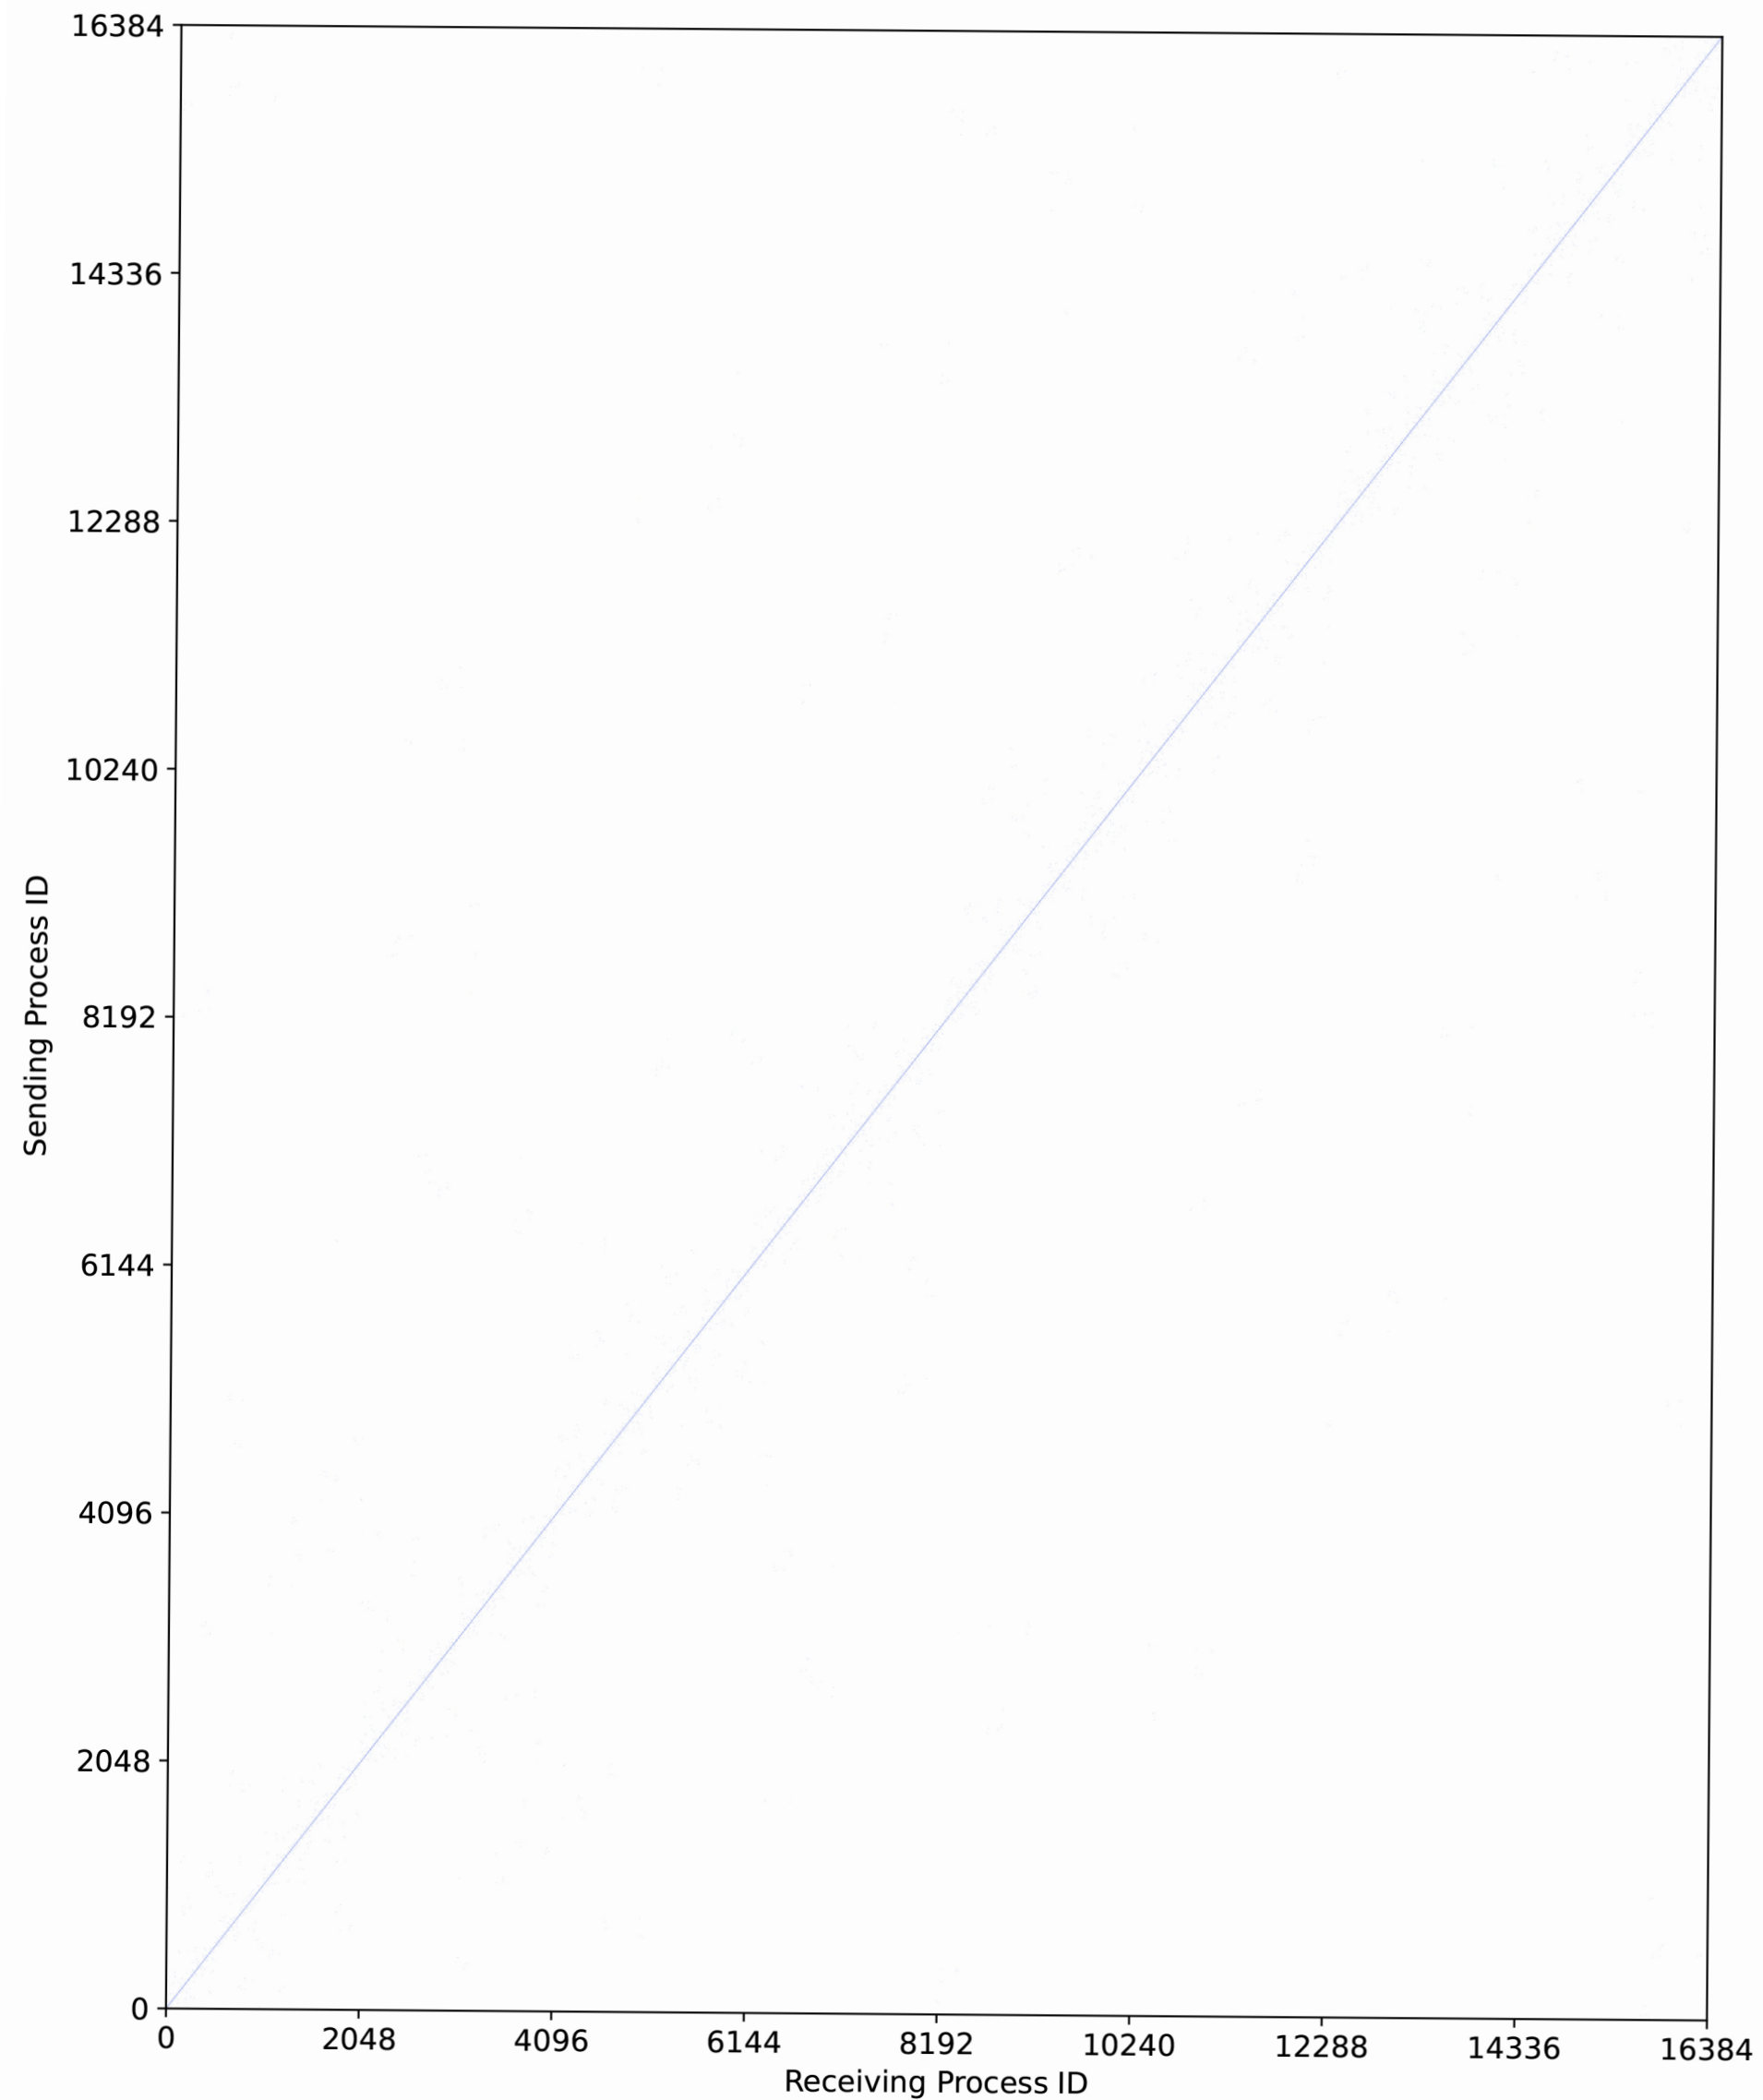

**(e) Data receiving volume per process in 16384 processes**

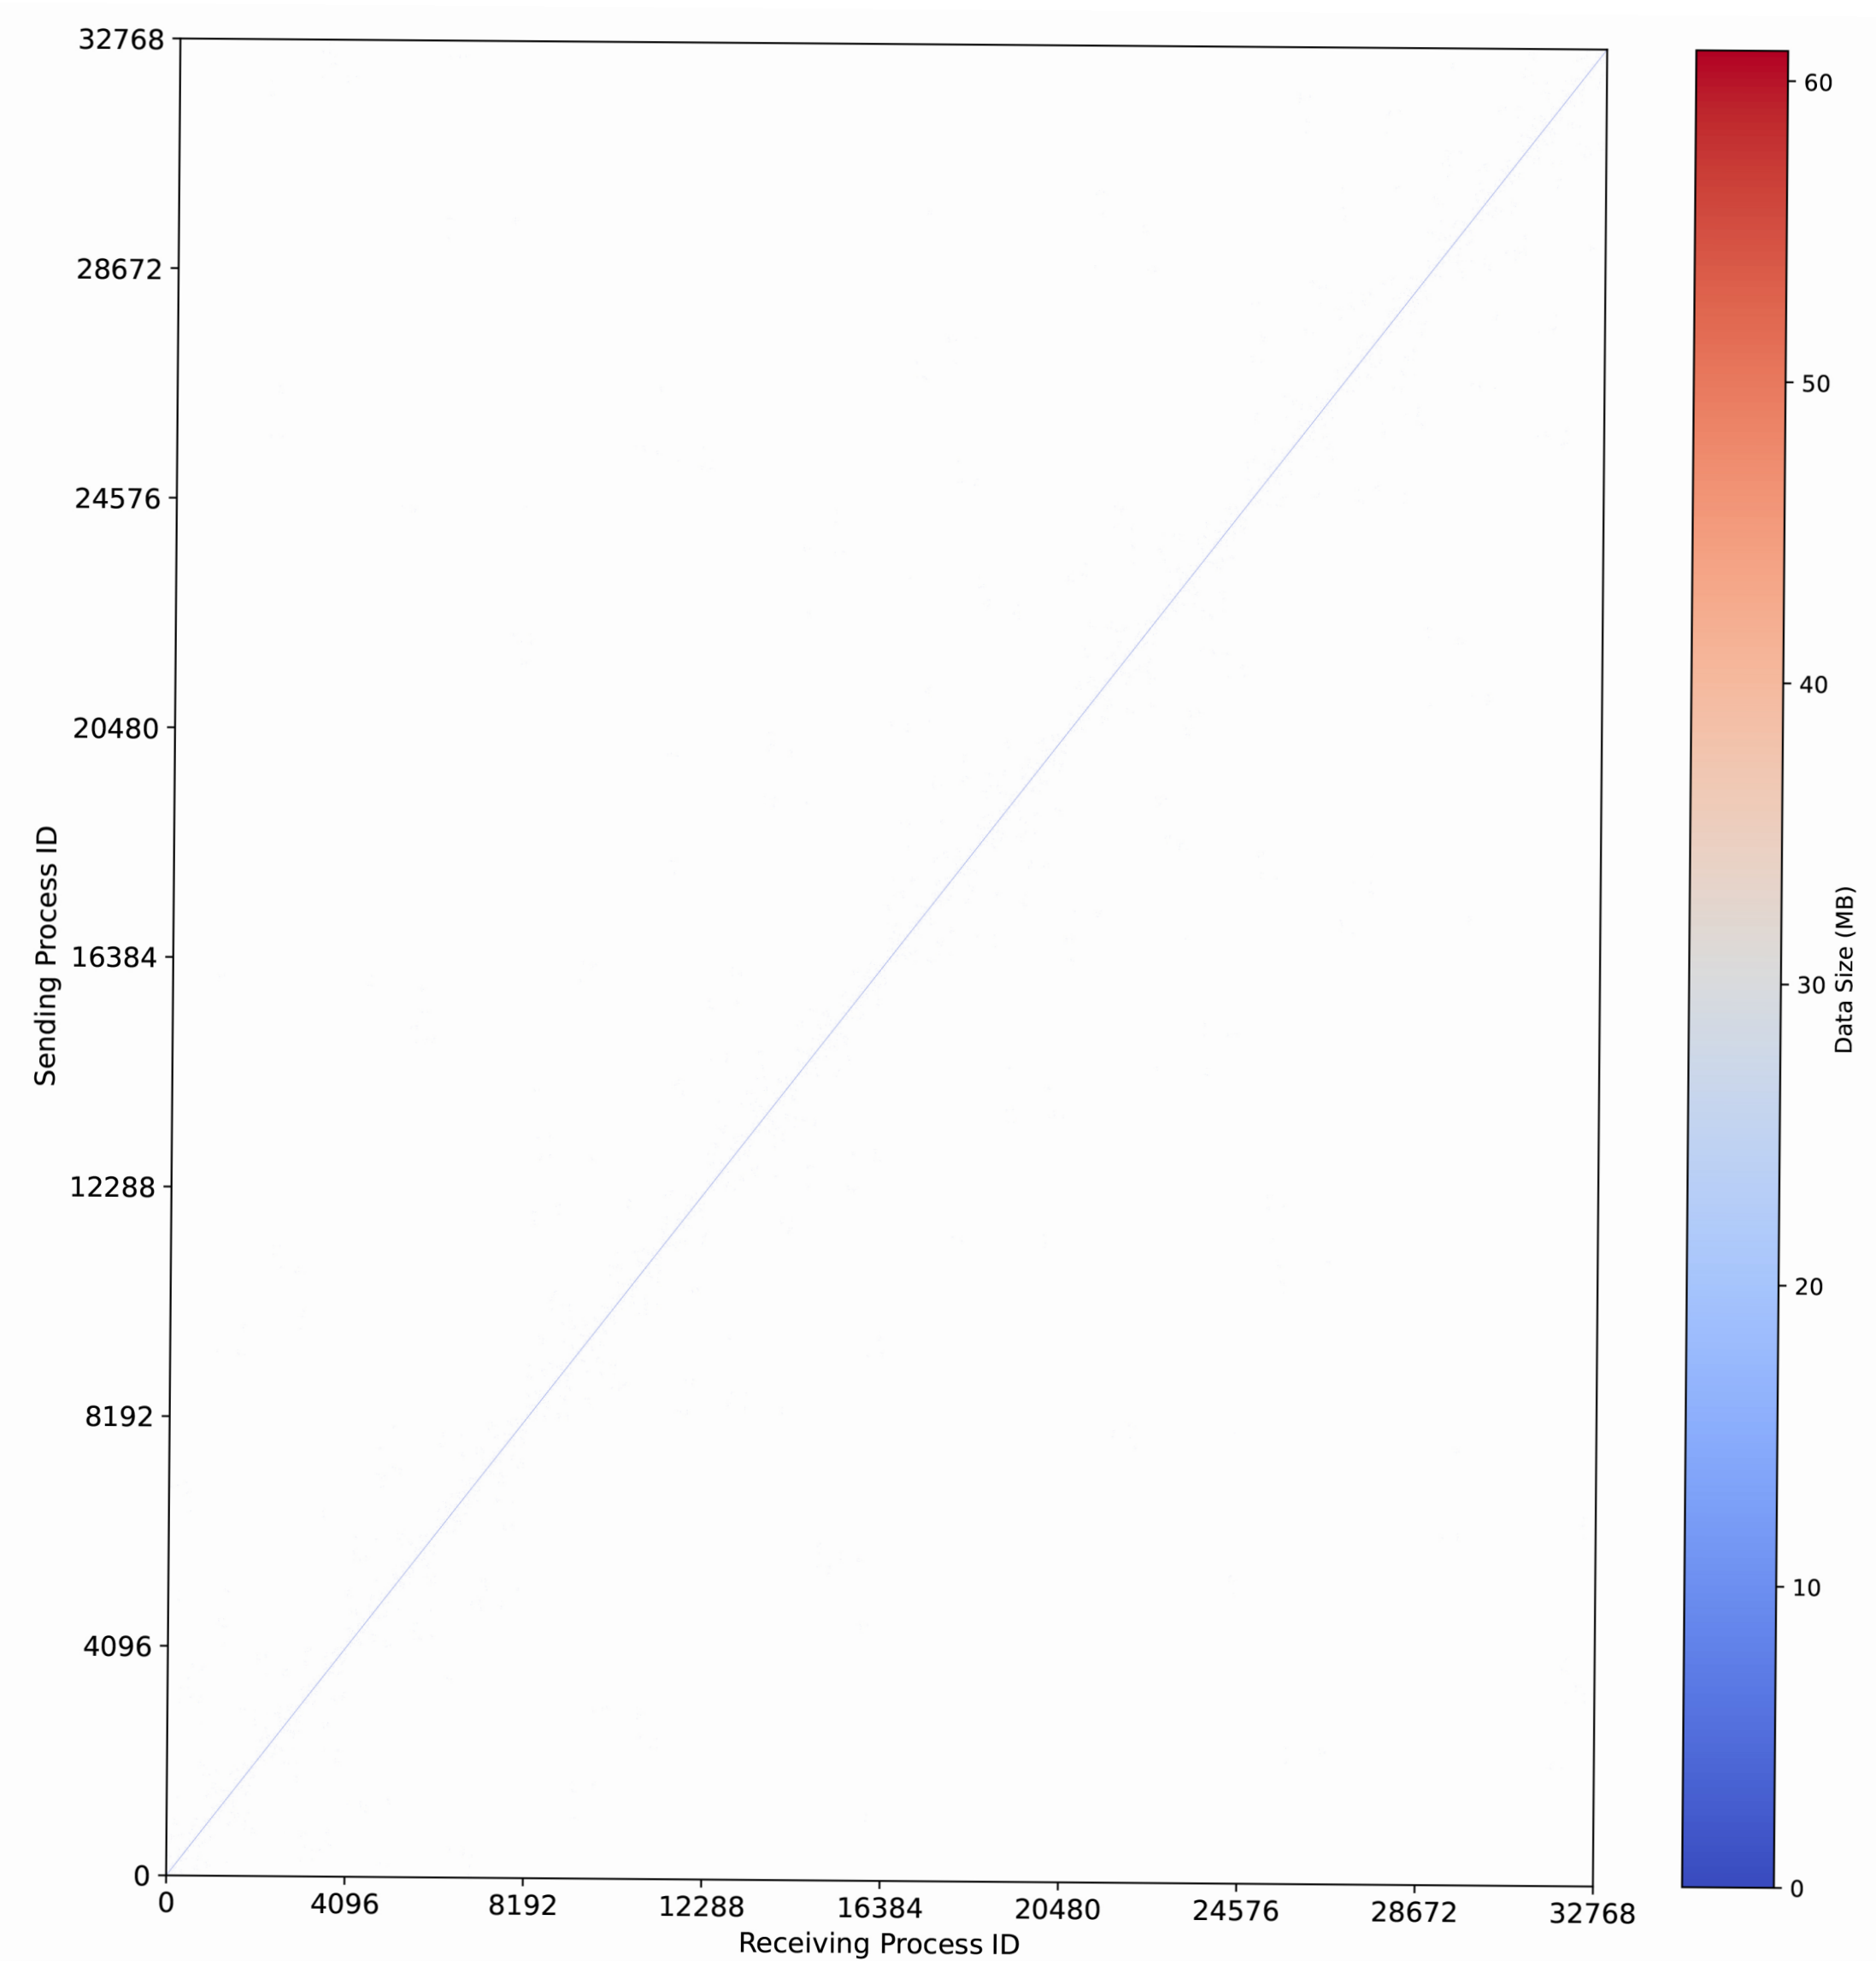

**(h) Data receiving volume per process in 32768 processes**

**Figure 12: Data receiving volume per process**
